# Supplementary material for: Unrestricted study of the Eley–Rideal formation of H2 on graphene using a new multidimensional graphene–H–H potential: role of the substrate
Source: Royal Society of Chemistry journal article supplement (doi:10.1039/b818614f), 2009-01-01
Supplement: b818614f-addcorr.doc [file b818614f-addcorr.doc]

**Additions and corrections**

**Unrestricted study of the Eley–Rideal formation of H2 on graphene using a new multidimensional graphene–H–H potential: role of the substrate**

D. Bachellerie, M. Sizun, F. Aguillon, D. Teillet-Billy, N. Rougeau and V. Sidis

*Phys. Chem. Chem. Phys.*, 2009, **11**, DOI: 10.1039/b818614f. ***Amendment published 5th March 2009***

A reference was missing from this paper. Ref. 38–42 should be numbered 39–43, and the references in the first sentence of section 2.2 should read as follows:

Among the available semiempirical potentials (Brenner,33 AIREBO,37 ReaxFF38) based on bond order, we chose the Brenner potential that has been judged flexible enough to implement the adaptations proposed below.

where the new ref. 38 is:

38 A. C. T. van Duin, S. Dasgupta, F. Lorant and W. A. Goddard III, *J. Phys. Chem. A*, 2001, **105**, 9396.

The Royal Society of Chemistry apologises for these errors and any consequent inconvenience to authors and readers.
